# Supplementary material for: Reversible-deactivation radical polymerization of chloroprene and the synthesis of novel polychloroprene-based block copolymers by the RAFT approach
Source: Royal Society of Chemistry journal article supplement (doi:10.1039/c4ra08715a), 2014-01-01
Supplement: c4ra08715a1.pdf [file c4ra08715a1.pdf]

Electronic Supplementary Information (ESI)  
**Reversible-Deactivation Radical Polymerization of  
Chloroprene and the Synthesis of Novel Polychloroprene-  
Based Block Copolymers by the RAFT Approach**

**Jia Hui, Zhijiao Dong, Yan Shi,\* Zhifeng Fu, Wantai Yang**

*State Key Laboratory of Chemical Resource Engineering,  
Beijing University of Chemical Technology,  
Beijing 100029, China  
E-mail: shiyan@mail.buct.edu.cn  
Fax: +86-010-64423811; Tel: +86-010-64416783*

**Radical Polymerization of Chloroprene in the Presence of DBTTC**

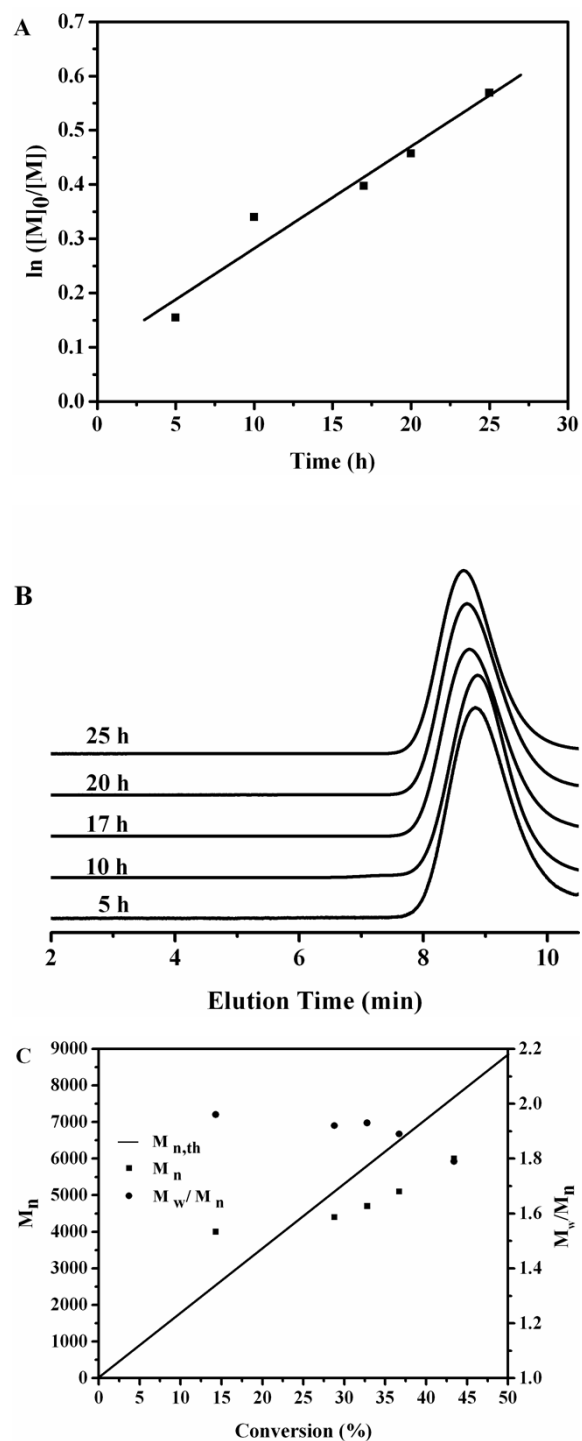

**Figure S1.** (A) Relationships of  $\ln([M]_0/[M])$  with polymerization time, (B) SEC traces, and (C) Plots of  $M_n$  and  $M_w/M_n$  vs conversion in the RAFT polymerization of CP using DBTTC as RAFT agent in benzene at 60 °C (entry 1 in Table 3).

## PCP-PMMA copolymer

PCP macro-RAFT agent was synthesized as described in Experimental Section employing CPDB as RAFT agent (Page 2 Line 86-89). Then 2 g of PCP-macro RAFT agent ( $M_n = 1800 \text{ g}\cdot\text{mol}^{-1}$ ,  $M_w/M_n = 1.21$ ), 22.25 g of MMA (222 mmol), 0.0456 g of AIBN (0.28 mmol) were dissolved in 33.4 g of benzene and purged with argon for 10 min. After five freeze-thaw-pump cycles, the flask was filled with argon and immersed in a preheated oil bath at 75 °C.

Figure S2. displays the  $^1\text{H}$  NMR of PCP prepared via RAFT polymerization mediated by CPDB. The resonances at  $\delta = 5.2\text{-}5.9$  (b) are attributed to the methyldyne protons of PCP backbone. The resonances at  $\delta = 7.8\text{-}8.0$  (a) are due to the aromatic protons of RAFT end group.

Provided that each PCP macromolecule contains only one CPDB group, the number averaged molecular weights based on  $^1\text{H}$  NMR spectrum ( $M_{n, \text{NMR}}$ ) can be calculated according to Equation (1):

$$M_{n, \text{NMR}} = \left[ \frac{I_b/1}{I_a/2} \right] \times M_{\text{CP}} + M_{\text{CPDB}} \quad (1)$$

Where  $I_b$  and  $I_a$  are the integral values of the peaks b and a, respectively.

The calculated  $M_{n, \text{NMR}}$  was 2000, which was close to the theoretical value (1900) and  $M_{n, \text{SEC}}$  (1800). These indicate that each PCP macromolecule contains one dithioester group. In other words, PCP capped with dithioester group as the macro-RAFT agent was high purity and narrow dispersity end-functional polymer.

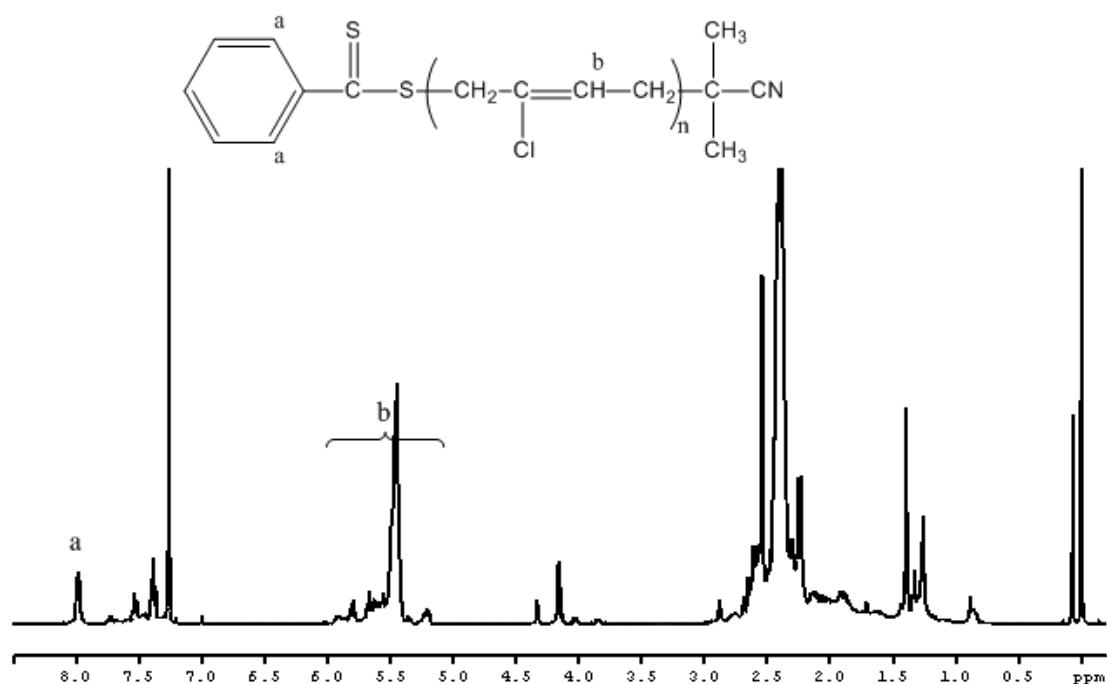

**Figure S2.**  $^1\text{H}$  NMR spectrum of PCP with CPDB as the CTA in benzene at 60 °C ( $[\text{CP}] = 5.64 \text{ M}$ ,  $[\text{CP}]_0/[\text{CPDB}]_0/[\text{AIBN}]_0 = 200:1:0.25$ ).

**Table S1.** Experimental results for the PCP-PMMA copolymer with PCP as macro-RAFT agent

| Sample Name          | $M_n$      | $M_w$      | $\bar{D}$ |
|----------------------|------------|------------|-----------|
| PCP macro-RAFT agent | 1800       | 2200       | 1.21      |
| 15h                  | 10900/1700 | 14400/2200 | 1.34/1.25 |
| 30h                  | 16700/1700 | 28000/2100 | 1.68/1.23 |

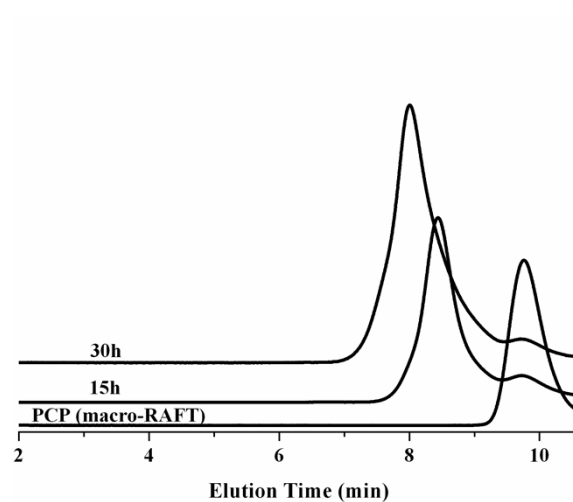

**Figure S3.** SEC traces of the attempted RAFT polymerization using MMA as monomer and PCP ( $M_n = 1800 \text{ g} \cdot \text{mol}^{-1}$ ,  $M_w/M_n = 1.21$ ) as macro-chain-transfer agent.

### PCP-PSt copolymer

PCP macro-RAFT agent was synthesized as described in Experimental Section employing EPDTB as RAFT agent (Page 2 Line 86-89). Then 2 g of PCP-macro RAFT agent ( $M_n = 3000$  g·mol<sup>-1</sup>,  $M_w/M_n = 1.23$ ), 13.89 g of St (133 mmol), 0.0274 g of AIBN (0.17 mmol) were dissolved in 20.8 g of benzene and purged with argon for 10 min. After five freeze-thaw-pump cycles, the flask was filled with argon and immersed in a preheated oil bath at 60 °C.

Figure S4. displays the <sup>1</sup>H NMR of PCP prepared via RAFT polymerization mediated by EPDTB. All the characteristic protons signals of the RAFT terminals and chloroprene units are clearly observed. The peaks at  $\delta=7.92$  ppm, originating from RAFT agent-EPDTB, appeared in the obtained polymers. The signals d (4.15) are attributed to the methylene protons of -COO-CH<sub>2</sub>-CH<sub>3</sub>. The signals b and c (1.20) are attributed to the methyl protons of -C(CH<sub>3</sub>)<sub>2</sub>-COO-CH<sub>2</sub>-CH<sub>3</sub>. The signals e (5.2-5.9) are attributed to the methyldiene protons of PCP.

Provided that each PCP macromolecule contains only one EPDTB group, the number averaged molecular weights based on <sup>1</sup>H NMR spectrum ( $M_{n, NMR}$ ) can be calculated according to Equation (2):

$$M_{n, NMR} = \left[ \frac{I_e/1}{I_a/2} \right] \times M_{CP} + M_{EPDTB} \quad (2)$$

Where  $I_e$  and  $I_a$  are the integral values of the peaks e and a, respectively. The calculated  $M_{n, NMR}$  was 3100, which was close to the theoretical value (3000) and  $M_{n, SEC}$  (3000). These indicate that each PCP macromolecule contains one dithioester group. These demonstrate that PCP capped with dithioester group as the macro-RAFT agent was high purity and narrow dispersity end-functional polymer.

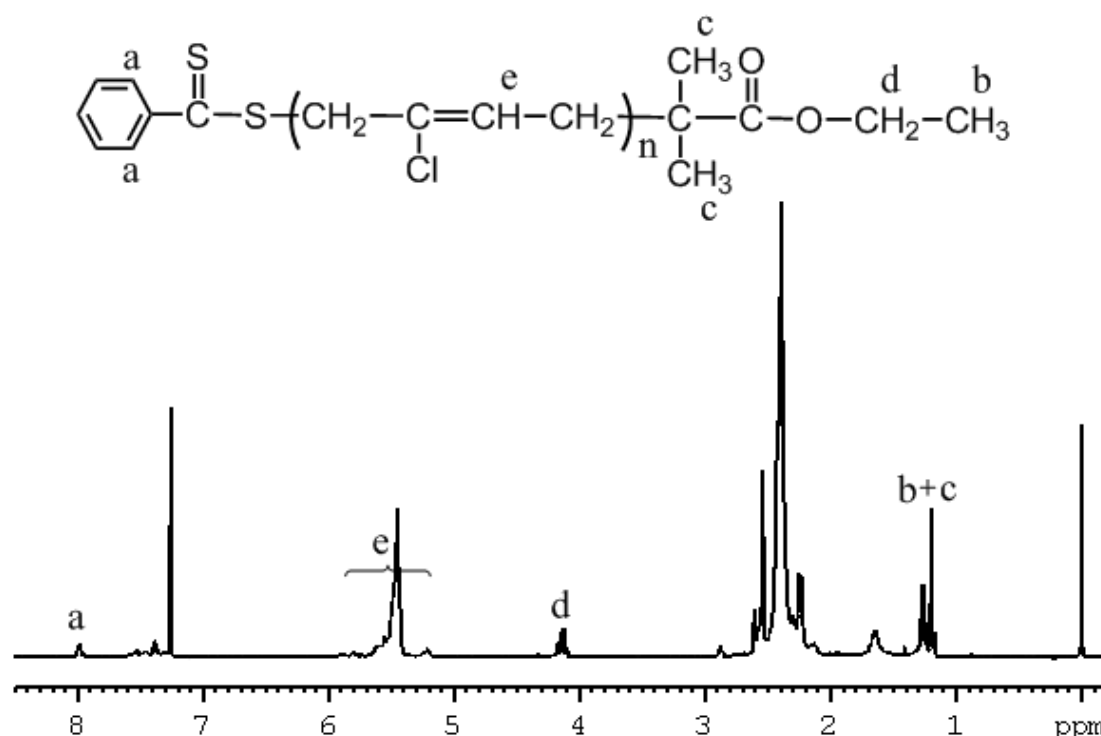

**Figure S4.** <sup>1</sup>H NMR spectrum of PCP with EPDTB as the CTA in benzene at 60 °C ([CP] = 5.64 M, [CP]<sub>0</sub>/[EPDTB]<sub>0</sub>/[AIBN]<sub>0</sub> = 200:1:0.25).

**Table S2.** Experimental results for the PCP-PSt copolymer with PCP as macro-RAFT agent

| Sample Name          | $M_n$      | $M_w$      | $\bar{D}$ |
|----------------------|------------|------------|-----------|
| PCP macro-RAFT agent | 3000       | 3700       | 1.23      |
| 24h                  | 8600/3000  | 9300/3600  | 1.08/1.20 |
| 36h                  | 10200/3100 | 10900/4200 | 1.07/1.35 |

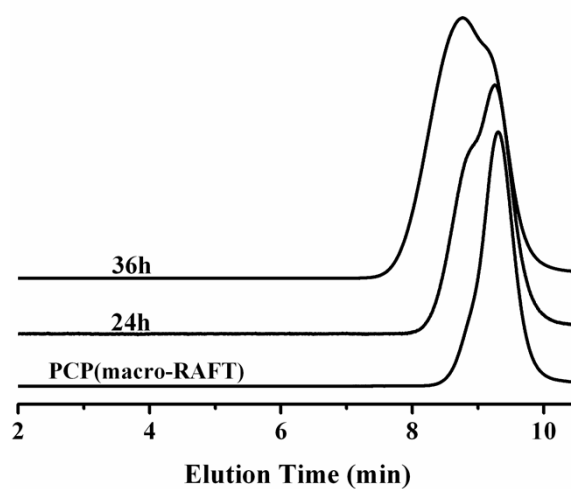

**Figure S5.** SEC traces of the attempted RAFT polymerization using St as monomer and PCP ( $M_n = 3000 \text{ g}\cdot\text{mol}^{-1}$ ,  $M_w/M_n = 1.23$ ) as macro-chain-transfer agent.
